# Supplementary material for: Effect of Gracilaria vermiculophylla Macroalga on Non-Alcoholic Fatty Liver Disease in Obese Rats
Source: MDPI journal article supplement (doi:10.3390/antiox13030369), 2024-03-18
Supplement: s1 [file s1]

|                                        |        |        |        |    |        |    |        |        |
|----------------------------------------|--------|--------|--------|----|--------|----|--------|--------|
| CPT-1a                                 | ↑      | ↑      | NS     | NS | NS     | ↓  | ↓      | NS     |
| ACO                                    | ↑      | ↑      | NS     | NS | NS     | ↓  | ↓      | NS     |
| SIRT3                                  | NS     | NS     | NS     | NS | NS     | NS | NS     | NS     |
| Ac. PGC1 $\alpha$ /total PGC1 $\alpha$ | NS     | NS     | NS     | NS | NS     | NS | NS     | NS     |
| NRF1                                   | ↓      | NS     | NS     | NS | ↑      | ↑  | ↑      | NS     |
| TFAM                                   | ↓      | NS     | NS     | NS | ↑      | NS | NS     | NS     |
| MTP                                    | ↓      | NS (↓) | ↓      | NS | NS     | NS | NS     | NS     |
| P62                                    | NS     | NS     | NS     | NS | NS     | NS | NS     | NS     |
| Oxidative stress related markers       |        |        |        |    |        |    |        |        |
| SOD                                    | NS     | NS     | NS     | NS | NS     | NS | NS     | NS     |
| GPx                                    | ↓      | ↓      | ↓      | ↓  | NS     | ↓  | ↓      | NS     |
| Catalase                               | ↓      | ↓      | NS     | NS | NS     | NS | NS     | NS     |
| rGSH                                   | NS     | ↑      | NS     | NS | NS (↑) | NS | NS     | NS     |
| MDA                                    | ↓      | NS     | NS     | ↑  | NS (↑) | ↑  | NS     | ↑      |
| Trolox                                 | NS (↑) | ↑      | ↑      | NS | ↑      | NS | ↑      | NS (↓) |
| Inflammation related markers           |        |        |        |    |        |    |        |        |
| Il1b                                   | NS     | NS     | ↑      | NS | NS     | NS | NS (↑) | NS     |
| Tnfa                                   | NS     | NS     | NS     | NS | NS     | NS | NS     | NS     |
| Crp                                    | NS (↓) | ↓      | NS     | NS | NS     | NS | NS     | NS     |
| Mcp1                                   | NS (↑) | NS     | NS     | NS | NS     | NS | NS     | NS     |
| F4/80                                  | ↑      | NS     | NS     | NS | ↓      | ↓  | NS     | NS     |
| CD206                                  | NS     | ↑      | ↑      | ↑  | NS     | NS | NS     | NS     |
| Fibrosis related markers               |        |        |        |    |        |    |        |        |
| Acta2                                  | ↑      | ↑      | ↑      | ↑  | NS (↑) | ↑  | NS     | NS     |
| Col1a1                                 | NS     | ↓      | NS (↓) | NS | NS     | NS | NS     | NS     |
| Timp1                                  | NS (↑) | ↑      | ↑      | ↑  | NS     | NS | NS     | NS     |
| Tfgeb1                                 | NS     | ↑      | ↑      | ↑  | NS     | NS | ↑      | NS     |
| Mmp9                                   | NS     | NS (↑) | NS (↑) | ↑  | NS     | ↑  | NS     | NS     |

ACC: acetyl-CoA carboxylase, ACO: acyl-coenzyme A, Acta2:  $\alpha$ -smooth muscle actin, ALP: alkaline phosphatase, ALT/GPT: alanine aminotransferase, AQP9: aquaglyceroporin 9, AST/GOT: aspartate aminotransferase, CD206: mannose receptor C, CHREBP: carbohydrate-responsive element-binding protein, Col1a1: collagen 1, CPT-1a: carnitine palmitoyltransferase-1a, Crp: C-reactive protein, DGAT2: diacylglycerol acyltransferase 2, F4/80: adhesion G protein-coupled receptor E1, FAS: fatty acid synthase, FATP2: fatty acid transport protein 2, GPx: glutathione peroxidase, HOMA-IR: homeostatic model assessment for insulin resistance, Il1b: interleukin 1b, Mcp1: monocyte chemoattractant protein 1, MDA: malondialdehyde, Mmp9: matrix metalloproteinase 9, MTP: microsomal triglyceride transfer protein, NEFA: non-esterified fatty

acid, NRF1: nuclear respiratory factor 1, P62: sequestome-1, PGC1 $\alpha$ : peroxisome proliferator-activated receptor gamma coactivator 1-alpha, rGSH: reduced glutathione, R-QUICKI: revised quantitative insulin sensitivity check index, SIRT3: sirtuin 3, SOD: superoxide dismutase, TFAM: mitochondrial transcription factor A, Tgf $\beta$ 1: transforming growth factor beta1, Timp: tissue inhibitor of matrix metalloproteases, Tnfa: tumor necrosis factor  $\alpha$ . NS: non-significant,  $\uparrow$ : increase,  $\downarrow$ : decrease, NS ( $\uparrow$ ): tendency towards increased values, NS ( $\downarrow$ ): tendency towards decreased values. Experimental groups: HGV, *Gracilaria vermiculophylla* 5 %; LC, lean control; LGV, *Gracilaria vermiculophylla* 2.5 %; OC, obese control; PF, pair-fed.
